# Supplementary material for: Opacification Domain of Serum Opacity Factor Inhibits Beta-Hemolysis and Contributes to Virulence of Streptococcus pyogenes
Source: PubMed Central journal article supplement (PMC5397570; doi:10.1128/mspheredirect.00147-17), 2017-04-19

MGAS27556

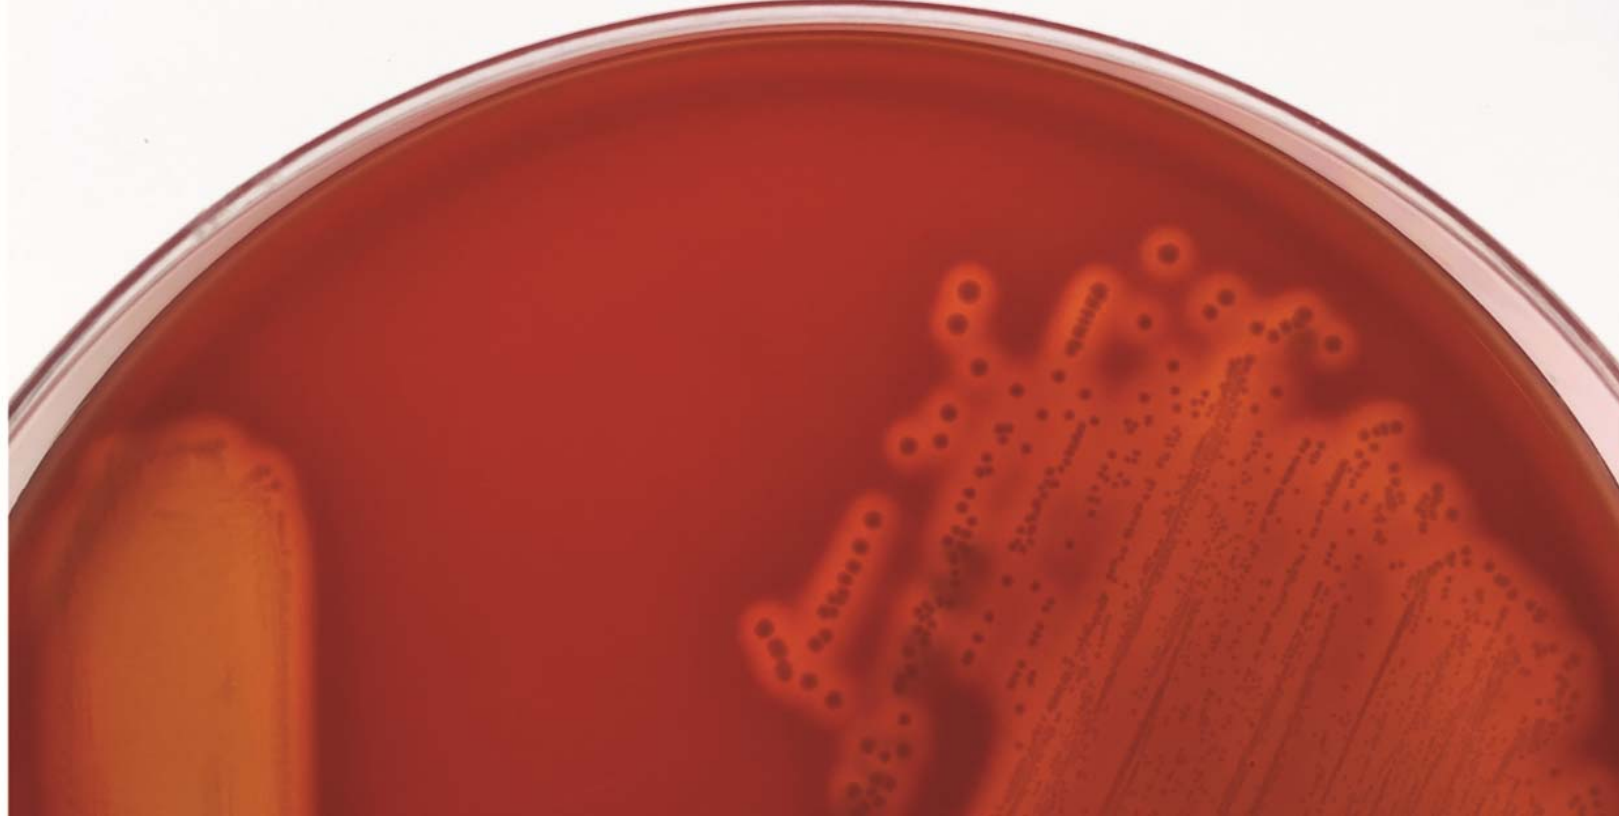

$\Delta$ sagB

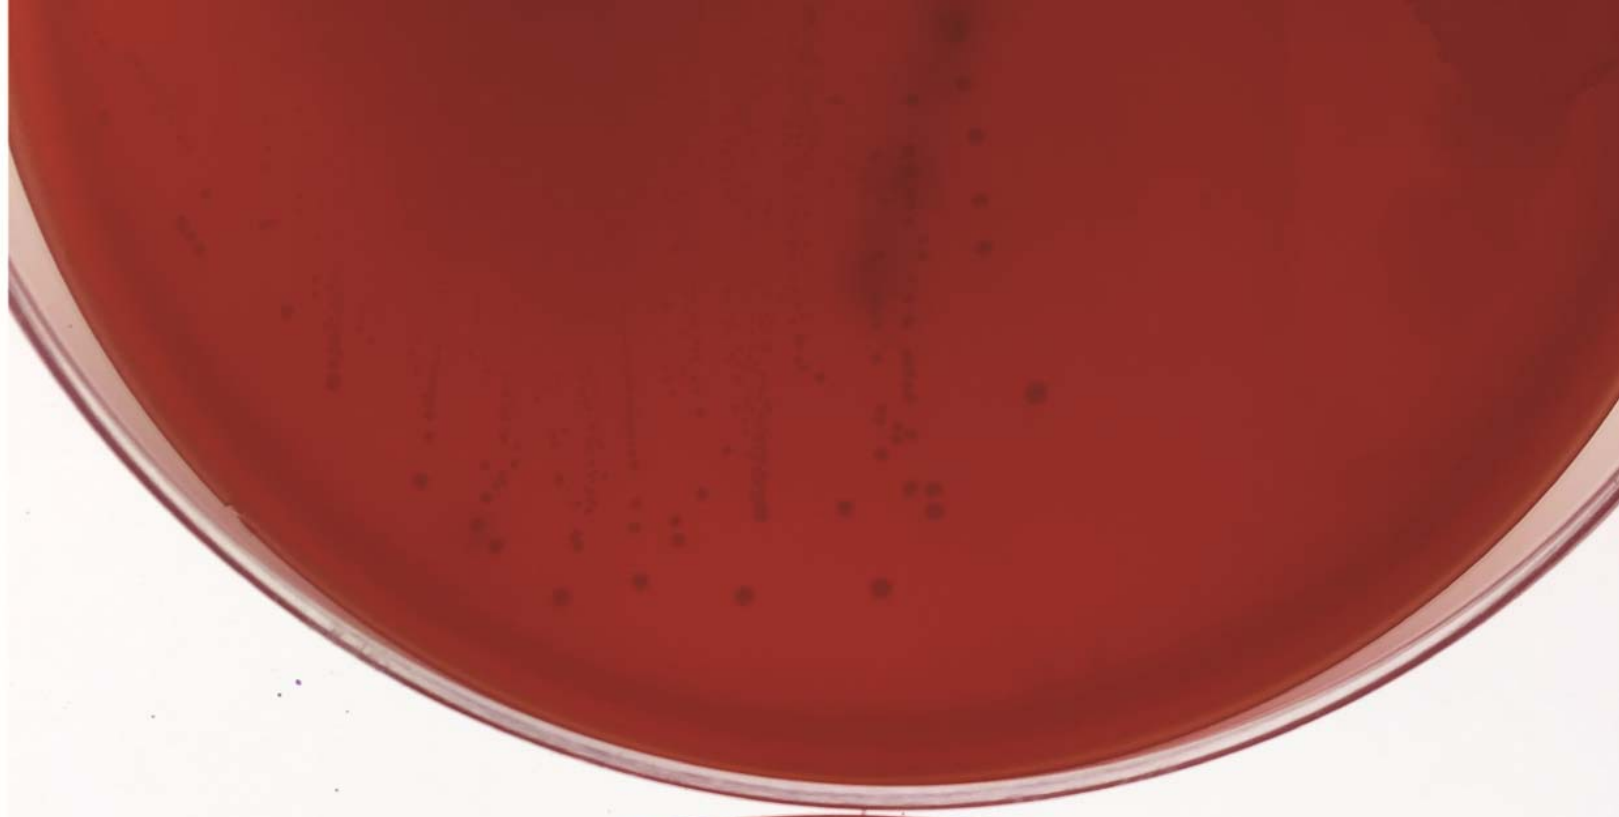

Supplement: sph002172272sf2.pdf [file sph002172272sf2.pdf]
