# Supplementary material for: Opacification Domain of Serum Opacity Factor Inhibits Beta-Hemolysis and Contributes to Virulence of Streptococcus pyogenes
Source: PubMed Central journal article supplement (PMC5397570; doi:10.1128/mspheredirect.00147-17), 2017-04-19
Supplement: sph002172272sf3.pdf [file sph002172272sf3.pdf]

MGAS27556 sof 2100 AACAGCTCTCGAGGAAAAATAAAGAAGAAGAGAACAAAACGTTCTACACCTACAGAAAATGAAAACCTGTGCACAGAAAAATCATTCAAACTACT 2199  
 MGAS26786 sof 2099 AACAGCTCTCGAGGAAAAATAAAGAAGAAGAGAACAAAACGTTCTACACCTACAGAAAATGAAAACCTGTGCACAGAAAAATCATTCAAACTACT 2198  
 MGAS27027 sof 2101 AACAGCTCTCGAGGAAAAATAAAGAAGAAGAGAACAAAACGTTCTACACCTACAGAAAATGAAAACCTGTGCACAGAAAAATCATTCAAACTACT 2200  
 \*\*\*\*\*  
 MGAS27556 sof 2200 ACCTACGAAATTAATGAACAAAAGTTGAAGGGAACAACTTGGTGATGTTAGTCTGACATACAGTAAATCAAGGTTCTGTACCACAGATTGATGGCC 2299  
 MGAS26786 sof 2199 ACCTACGAAATTAATGAACAAAAGTTGAAGGGAACAACTTGGTGATGTTAGTCTGACATACAGTAAATCAAGGTTCTGTACCACAGATTGATGGCC 2298  
 MGAS27027 sof 2201 ACCTACGAAATTAATGAACAAAAGTTGAAGGGAACAACTTGGTGATGTTAGTCTGACATACAGTAAATCAAGGTTCTGTACCACAGATTGATGGCC 2300  
 \*\*\*\*\*  
 MGAS27556 sof 2300 ATGTTATTGAGCCACAAGCACCGACATTACCTAAGTTACCTCCTGTTATTGAGCATGGCCCTAACCTTGAGTATGAGGAAGAACAGGTTATCAGTTACC 2399  
 MGAS26786 sof 2299 ATGTTATTGAGCCACAAGCACCGACATTACCTAAGTTACCTCCTGTTATTGAGCATGGCCCTAACCTTGAGTATGAGGAAGAACAGGTTATCAGTTACC 2398  
 MGAS27027 sof 2301 ATGTTATTGAGCCACAAGCACCGACATTACCTAAGTTACCTCCTGTTATTGAGCATGGCCCTAACCTTGAGTATGAGGAAGAACAGGTTATCAGTTACC 2400  
 \*\*\*\*\*  
 MGAS27556 sof 2400 ACTTAAACATGGCAGCAATGCCACGACACACAAGTGACAATTGAAGAAGACACAGTTCTCAACGTCAGATATCCTTGTAGGCGGTCAGAGTGGACC 2499  
 MGAS26786 sof 2399 ACTTAAACATGGCAGCAATGCCACGACACACAAGTGACAATTGAAGAAGACACAGTTCTCAACGTCAGATATCCTTGTAGGCGGTCAGAGTGGACC 2498  
 MGAS27027 sof 2401 ACTTAAACATGGCAGCAATGCCACGACACACAAGTGACAATTGAAGAAGACACAGTTCTCAACGTCAGATATCCTTGTAGGCGGTCAGAGTGGACC 2500  
 \*\*\*\*\*  
 MGAS27556 sof 2500 GTTGACATCACCGAAGATACCCAACCGATTGTCCAGGCTCAATGACGCGACAGTTGTGAGGAAGACACAGCACCTAACGTCAGATGTCTTGTG 2599  
 MGAS26786 sof 2499 GTTGACATCACCGAAGATACCCAACCGATTGTCCAGGCTCAATGACGCGACAGTTGTGAGGAAGACACAGCACCTAACGTCAGATGTCTTGTG 2598  
 MGAS27027 sof 2501 GTTGACATCACCGAAGATACCCAACCGATTGTCCAGGCTCAATGACGCGACAGTTGTGAGGAAGACACAGCACCTAACGTCAGATGTCTTGTG 2600  
 \*\*\*\*\*  
 MGAS27556 sof 2600 GTGGTCAAAGTGAGCCAATCGATATCACTGAAGATACCCAACCAAGTGTGTCAGGCTCAATGACGCGACAGTTGTGAGGAAGACACAGTACCTCAACG 2699  
 MGAS26786 sof 2599 GTGGTCAAAGTGAGCCAATCGATATCACTGAAGATACCCAACCAAGTGTGTCAGGCTCAATGACGCGACAGTTGTGAGGAAGACACAGTACCTCAACG 2698  
 MGAS27027 sof 2601 GTGGTCAAAGTGAGCCAATCGATATCACTGAAGATACCCAACCAAGTGTGTCAGGCTCAATGACGCGACAGTTGTGAGGAAGACACAGTACCTCAACG 2700  
 \*\*\*\*\*  
 MGAS27556 sof 2700 TCCAGATATCCTTGTGGCGGTCAAAGTGATCCAATCGATATCACCGAAGATACCCAACCGATTGTGAGGCTCAATGACGCTACTGTTATCGAAGAA 2799  
 MGAS26786 sof 2699 TCCAGATATCCTTGTGGCGGTCAAAGTGATCCAATCGATATCACCGAAGATACCCAACCGATTGTGAGGCTCAATGACGCTACTGTTATCGAAGAA 2798  
 MGAS27027 sof 2701 TCCAGATATCCTTGTGGCGGTCAAAGTGATCCAATCGATATCACCGAAGATACCCAACCGATTGTGAGGCTCAATGACGCTACTGTTATCGAAGAA 2800  
 \*\*\*\*\*  
 MGAS27556 sof 2800 GATACGAAACAAAACGCTTCTTCCACTTTGATAACGAGCCACAAGCACAGAAAACCTAAAGAGCAACATCTCTCAGCTTACCACAAGCTCCAGTCT 2899  
 MGAS26786 sof 2799 GATACGAAACAAAACGCTTCTTCCACTTTGATAACGAGCCACAAGCACAGAAAACCTAAAGAGCAACATCTCTCAGCTTACCACAAGCTCCAGTCT 2898  
 MGAS27027 sof 2801 GATACGAAACAAAACGCTTCTTCCACTTTGATAACGAGCCACAAGCACAGAAAACCTAAAGAGCAACATCTCTCAGCTTACCACAAGCTCCAGTCT 2900  
 \*\*\*\*\*  
 MGAS27556 sof 2900 ATAAGGCAGCTCATCACTTGCCCTGCATCTGGAGACAAACGTGAAGCATCCTTTACAATTGTTGCTCTAACAAATATTGGAGCTGCAGGTTTGTCTCAGCAA 2999  
 MGAS26786 sof 2899 ATAAGGCAGCTCATCACTTGCCCTGCATCTGGAGACAAACGTGAAGCATCCTTTACAATTGTTGCTCTAACAAATATTGGAGCTGCAGGTTTGTCTCAGCAA 2998  
 MGAS27027 sof 2901 ATAAGGCAGCTCATCACTTGCCCTGCATCTGGAGACAAACGTGAAGCATCCTTTACAATTGTTGCTCTAACAAATATTGGAGCTGCAGGTTTGTCTCAGCAA 3000  
 \*\*\*\*\*  
 MGAS27556 sof 3000 AAAACGTCGCGACACCGAAGAAAATAA 3027  
 MGAS26786 sof 2999 AAAACGTCGCGACACCGAAGAAAATAA 3026  
 MGAS27027 sof 3001 AAAACGTCGCGACACCGAAGAAAATAA 3028  
 \*\*\*\*\*
