# Supplementary material for: Opacification Domain of Serum Opacity Factor Inhibits Beta-Hemolysis and Contributes to Virulence of Streptococcus pyogenes
Source: PubMed Central journal article supplement (PMC5397570; doi:10.1128/mspheredirect.00147-17), 2017-04-19
Supplement: sph002172272sf4.pdf [file sph002172272sf4.pdf]

|           |     |      |                                                                                                        |      |
|-----------|-----|------|--------------------------------------------------------------------------------------------------------|------|
| MGAS27556 | SOF | 1    | MTNCKYKLRKLSVGLVSVGTMLIAPTVLQGQEVSTGASSTETSASTNTSTASAGTSTSETAASGTGSEAAVVSSEGSQSSSESGQASTQPQAQTLQESAATS | 100  |
| MGAS26786 | SOF | 1    | MTNCKYKLRKLSVGLVSVGTMLIAPTVLQGQEVSTGASSTETSASTNTSTASAGTSTSETAASGTGSEAAVVSSEGSQSSSESGQASTQPQAQTLQESAATS | 100  |
| MGAS27027 | SOF | 1    | MTNCKYKLRKLSVGLVSVGTMLIAPTVLQGQEVSTGASSTETSASTNTSTASAGTSTSETAASGTGSEAAVVSSEGSQSSSESGQASTQPQAQTLQESAATS | 100  |
| MGAS27556 | SOF | 101  | PSSNSSTSSSEDKAPKAASKSSSATVASSSNGSNQGAGAEDAPQMMDVERYTVDRKTELNIKDGKTPKTRNSVDKDTKLIRNRDQKQRDIVDIKREVK     | 200  |
| MGAS26786 | SOF | 101  | PSSNSSTSSSEDKAPKAASKSSSATVASSSNGSNQGAGAEDAHR-----                                                      | 145  |
| MGAS27027 | SOF | 101  | PSSNSSTSSSEDKAPKAASKSSSATVASSSNGSNQGAGAEDAPQMMDVERYTVDRKTELNIKDGKTPKTRNSVDKDTKLIRNRDQKQRDIVDIKREVK     | 200  |
| MGAS27556 | SOF | 201  | DNGDGLDVTLKVTPKEIDKGADVMALLDVSKKMTDADFKNADKIKKLVTTLTSKSASNSDNDHEHKHNSRNSVRLMTFYREISNPIDISGKTAELDKL     | 300  |
| MGAS26786 | SOF | 146  | -----                                                                                                  | 145  |
| MGAS27027 | SOF | 201  | DNGDGLDVTLKVTPKEIDKGADVMALLDVSKKMTDADFKNADKIKKLVTTLTSKSASNSDNDHEHKHNSRNSVRLMTFYREISNPIDISGKTAELDKL     | 300  |
| MGAS27556 | SOF | 301  | LDDLRVKAKANYDWGVDLQGAHKAREIFNKEKESKKRQHIVLFSQGESTFSYDIQKSEKSSNLSRINEKITSNPLLPWPPIFDHTHQNDMINDVR        | 400  |
| MGAS26786 | SOF | 146  | -----                                                                                                  | 145  |
| MGAS27027 | SOF | 301  | LDDLRVKAKANYDWGVDLQGAHKAREIFNKEKESKKRQHIVLFSQGESTFSYDIQKSEKSSNLSRINEKITS-----                          | 376  |
| MGAS27556 | SOF | 401  | ALIAFASKLGIKNLSWIETLSALSVDGSLGVSFVGGGLGEYTLTKKEYDSQKLNEDQFDYTKRVGEGYHYHSFNSRESEDKMPLTEIKKALEAALPKF     | 500  |
| MGAS26786 | SOF | 146  | -----                                                                                                  | 145  |
| MGAS27027 | SOF | 377  | -----                                                                                                  | 376  |
| MGAS27556 | SOF | 501  | EENNWFTKVLKYFLGKDKAEQAKLDVIMKVIKSVFYKRYHYHNLNSAIAEAKMAQKEGITYFYSVDVTALNTARRVKRQTAVLKNTKEEERNKKFDEYL    | 600  |
| MGAS26786 | SOF | 146  | -----                                                                                                  | 145  |
| MGAS27027 | SOF | 377  | -----                                                                                                  | 376  |
| MGAS27556 | SOF | 601  | KKMSEGGNAFFNDVDKADKFKDTLTKLIKDEFDGGKSVDKTSYQSSSAINYSEASNSFWRTTKESLWTWISKEQLKAFEDGKPLTFTYKLVKVDNNKFK    | 700  |
| MGAS26786 | SOF | 146  | -----                                                                                                  | 145  |
| MGAS27027 | SOF | 377  | -----                                                                                                  | 376  |
| MGAS27556 | SOF | 701  | TALEENKTKRSTPTENENSVTEKIIISNTTYEINEQKVEGNKLDVSLTYSKFKVPPQIDGHVIEPQAPLPLKPPVIEHGNPFYEEETGYQLP           | 800  |
| MGAS26786 | SOF | 146  | -----                                                                                                  | 145  |
| MGAS27027 | SOF | 377  | -----                                                                                                  | 376  |
| MGAS27556 | SOF | 801  | LKHGSNAPDQVTIEEDTVPQRPDILVGGQSGPVDITDTPQMGSGSNDATVVEEDTAPKRPDVLVGGQSEPIDITDTPQSVSGSNDATVVEEDTVPQR      | 900  |
| MGAS26786 | SOF | 146  | -----                                                                                                  | 145  |
| MGAS27027 | SOF | 377  | -----                                                                                                  | 376  |
| MGAS27556 | SOF | 901  | PDILVGGQSDPIDITDTPQMGSGSNDATVIEEDTKPKRFFHFDNEPQAEKPKQPSLSLPQAPVYKAAHHLPASGDKREASFTIVALTIIGAAGLLSK      | 1000 |
| MGAS26786 | SOF | 146  | -----                                                                                                  | 145  |
| MGAS27027 | SOF | 377  | -----                                                                                                  | 376  |
| MGAS27556 | SOF | 1001 | KRRDTEEN                                                                                               | 1008 |
| MGAS26786 | SOF | 146  | -----                                                                                                  | 145  |
| MGAS27027 | SOF | 377  | -----                                                                                                  | 376  |
