# Supplementary material for: Opacification Domain of Serum Opacity Factor Inhibits Beta-Hemolysis and Contributes to Virulence of Streptococcus pyogenes
Source: PubMed Central journal article supplement (PMC5397570; doi:10.1128/mspheredirect.00147-17), 2017-04-19
Supplement: sph002172272sf5.pdf [file sph002172272sf5.pdf]

MGAS29482 sof 1 TTGACAAATTTAAGTATAAACTTAGAAAAGTTATCTGTAGGGCTCGTCTCCGTGCGAACGATGCTGATAGCCCGACAGTTTTAGGACAGGAGGTTAGTG 100  
MGAS28016 sof 1 TTGACAAATTTAAGTATAAACTTAGAAAAGTTATCTGTAGGGCTCGTCTCCGTGCGAACGATGCTGATAGCCCGACAGTTTTAGGACAGGAGGTTAGTG 100  
MGAS12247 sof 1 TTGACAAATTTAAGTATAAACTTAGAAAAGTTATCTGTAGGGCTCGTCTCCGTGCGAACGATGCTGATAGCCCGACAGTTTTAGGACAGGAGGTTAGTG 100  
\*\*\*\*\*  
MGAS29482 sof 101 CTAGTAGTAGTACGGAGAGCAGTACCACACAGCTAATACTGGTACCGGTACGGCAAGTGGGATGACTGCCACTACTCC TAGTGCTACGACAGATACTGG 200  
MGAS28016 sof 101 CTAGTAGTAGTACGGAGAGCAGTACCACACAGCTAATACTGGTACCGGTACGGCAAGTGGGATGACTGCCACTACTCC TAGTGCTACGACAGATACTGG 200  
MGAS12247 sof 101 CTAGTAGTAGTACGGAGAGCAGTACCACACAGCTAATACTGGTACCGGTACGGCAAGTGGGATGACTGCCACTACTCC TAGTGCTACGACAGATACTGG 200  
\*\*\*\*\*  
MGAS29482 sof 201 TGAAGCAGCTGGGAGCGGAGCTAGGAGTGAAGCTAATGGTGCATCTCCGTAGTATCTAGC - GAAGAAAGTCAGAGTTCAGGCACTACTCCAGCCTCACC 299  
MGAS28016 sof 201 TGAAGCAGCTGGGAGCGGAGCTAGGAGTGAAGCTAATGGTGCATCTCCGTAGTATCTAGC GAAGAAAGTCAGAGTTCAGGCACTACTCCAGCCTCACC 300  
MGAS12247 sof 201 TGAAGCAGCTGGGAGCGGAGCTAGGAGTGAAGCTAATGGTGCATCTCCGTAGTATCTAGC - GAAGAAAGTCAGAGTTCAGGCACTACTCCAGCCTCACC 299  
\*\*\*\*\*  
MGAS29482 sof 300 CCAAGCACAGACAGCTCCAGCAGCAACGCTCAACATCATCGGCTTCTTCTAGTAAATGAGAAAACCTCCAAAGACAGCAACTACAACATCATCGACTCCA 399  
MGAS28016 sof 301 CCAAGCACAGACAGCTCCAGCAGCAACGCTCAACATCATCGGCTTCTTCTAGTAAATGAGAAAACCTCCAAAGACAGCAACTACAACATCATCGACTCCA 400  
MGAS12247 sof 300 CCAAGCACAGACAGCTCCAGCAGCAACGCTCAACATCATCGGCTTCTTCTAGTAAATGAGAAAACCTCCAAAGACAGCAACTACAACATCATCGACTCCA 399  
\*\*\*\*\*  
MGAS29482 sof 400 GTAGCAAGTACCAGTAATAATAGCAACAAGTAACCTAGTACTGAAGCTGAAACACAGACGATGGACGTTGGAACGGTATACAGTTGATAAGGAAAAATCAA 499  
MGAS28016 sof 401 GTAGCAAGTACCAGTAATAATAGCAACAAGTAACCTAGTACTGAAGCTGAAACACAGACGATGGACGTTGGAACGGTATACAGTTGATAAGGAAAAATCAA 500  
MGAS12247 sof 400 GTAGCAAGTACCAGTAATAATAGCAACAAGTAACCTAGTACTGAAGCTGAAACACAGACGATGGACGTTGGAACGGTATACAGTTGATAAGGAAAAATCAA 500  
\*\*\*\*\*  
MGAS29482 sof 500 AGCTAAATATTAAGACGGTAAAGACTCCAAAAACTAGGAGTAGTGTTAATAAAGACACAAAACTTATAGAAACCCGGATGACAAAACAGCGTGATATCGT 599  
MGAS28016 sof 501 AGCTAAATATTAAGACGGTAAAGACTCCAAAAACTAGGAGTAGTGTTAATAAAGACACAAAACTTATAGAAACCCGGATGACAAAACAGCGTGATATCGT 600  
MGAS12247 sof 500 AGCTAAATATTAAGACGGTAAAGACTCCAAAAACTAGGAGTAGTGTTAATAAAGACACAAAACTTATAGAAACCCGGATGACAAAACAGCGTGATATCGT 599  
\*\*\*\*\*  
MGAS29482 sof 600 TGATGTTACTCGGACAGTTAAACTAACGAAGTGGCACTATTGATGTTACCGTAAACGGTTAAACCGAAGCAAATTGACGAAGGCGCCGATGTTATGGCC 699  
MGAS28016 sof 601 TGATGTTACTCGGACAGTTAAACTAACGAAGTGGCACTATTGATGTTACCGTAAACGGTTAAACCGAAGCAAATTGACGAAGGCGCCGATGTTATGGCC 700  
MGAS12247 sof 600 TGATGTTACTCGGACAGTTAAACTAACGAAGTGGCACTATTGATGTTACCGTAAACGGTTAAACCGAAGCAAATTGACGAAGGCGCCGATGTTATGGCC 699  
\*\*\*\*\*  
MGAS29482 sof 700 CTTCTAGATGCTCTCAAAGATGACAAAAGAGAATTTTGATAAGGCTAAAGAACAAATAAAAAAATGGTTACGACTTTAACAGGCGAGCCAACTGATG 799  
MGAS28016 sof 701 CTTCTAGATGCTCTCAAAGATGACAAAAGAGAATTTTGATAAGGCTAAAGAACAAATAAAAAAATGGTTACGACTTTAACAGGCGAGCCAACTGATG 800  
MGAS12247 sof 700 CTTCTAGATGCTCTCAAAGATGACAAAAGAGAATTTTGATAAGGCTAAAGAACAAATAAAAAAATGGTTACGACTTTAACAGGCGAGCCAACTGATG 799  
\*\*\*\*\*  
MGAS29482 sof 800 GTAAGGAAAATCATAATAGGCGTAATCTGTACGCTAATGACTTTTTACCGTAAAGTTAATGAGCCTATCGAATTGACTGCTGAAAATGATAGCAAAAAC 899  
MGAS28016 sof 801 GTAAGGAAAATCATAATAGGCGTAATCTGTACGCTAATGACTTTTTACCGTAAAGTTAATGAGCCTATCGAATTGACTGCTGAAAATGATAGCAAAAAC 900  
MGAS12247 sof 800 GTAAGGAAAATCATAATAGGCGTAATCTGTACGCTAATGACTTTTTACCGTAAAGTTAATGAGCCTATCGAATTGACTGCTGAAAATGATAGCAAAAAC 899  
\*\*\*\*\*  
MGAS29482 sof 900 ATTAGATGAAGTTGGAAAAAGCTAAAGAAAGATTGGGACTGGGGCGTTGACTTACAGGAGCTATCCATAAAGCTCGAGAGATTTTTAATAAGGAAAAA 999  
MGAS28016 sof 901 ATTAGATGAAGTTGGAAAAAGCTAAAGAAAGATTGGGACTGGGGCGTTGACTTACAGGAGCTATCCATAAAGCTCGAGAGATTTTTAATAAGGAAAAA 1000  
MGAS12247 sof 900 ATTAGATGAAGTTGGAAAAAGCTAAAGAAAGATTGGGACTGGGGCGTTGACTTACAGGAGCTATCCATAAAGCTCGAGAGATTTTTAATAAGGAAAAA 999  
\*\*\*\*\*  
MGAS29482 sof 1000 GAAAAAAATCGGGTAAACGCCAGCATATCGTCTTGTCTCTCAAGGCGAATCAACCTTTAGTTATGATATTAATAAATAAAGTGATATTACAAAAACAA 1099  
MGAS28016 sof 1001 GAAAAAAATCGGGTAAACGCCAGCATATCGTCTTGTCTCTCAAGGCGAATCAACCTTTAGTTATGATATTAATAAATAAAGTGATATTACAAAAACAA 1100  
MGAS12247 sof 1000 GAAAAAAATCGGGTAAACGCCAGCATATCGTCTTGTCTCTCAAGGCGAATCAACCTTTAGTTATGATATTAATAAATAAAGTGATATTACAAAAACAA 1098  
\*\*\*\*\*  
MGAS29482 sof 1100 AAATAACTGAAAAGTTACGACCTTAGCCCACTGTTCCCTGGCTCCCTATCTTTAATCACACTAACCGAAAGGAGAGATTTAGTGATTTAGAAAA 1199  
MGAS28016 sof 1101 AAATAACTGAAAAGTTACGACCTTAGCCCACTGTTCCCTGGCTCCCTATCTTTAATCACACTAACCGAAAGGAGAGATTTAGTGATTTAGAAAA 1200  
MGAS12247 sof 1099 AAATAACTGAAAAGTTACGACCTTAGCCCACTGTTCCCTGGCTCCCTATCTTTAATCACACTAACCGAAAGGAGAGATTTAGTGATTTAGAAAA 1199  
\*\*\*\*\*  
MGAS29482 sof 1200 AGTACTAGACATGGCCGAAAAAGTGGGAATAAGTTACCTAGTAGTCTGAAGTCAGCAGTGAAGGCCCTTGGCTTAACATAAGTGAATAGGTTCTATT 1299  
MGAS28016 sof 1201 AGTACTAGACATGGCCGAAAAAGTGGGAATAAGTTACCTAGTAGTCTGAAGTCAGCAGTGAAGGCCCTTGGCTTAACATAAGTGAATAGGTTCTATT 1300  
MGAS12247 sof 1199 AGTACTAGACATGGCCGAAAAAGTGGGAATAAGTTACCTAGTAGTCTGAAGTCAGCAGTGAAGGCCCTTGGCTTAACATAAGTGAATAGGTTCTATT 1298  
\*\*\*\*\*  
MGAS29482 sof 1300 TTAGGGAAAAGGTTTGACAGAGTACCTTGGTTTGACAGAATATAGTTCAGATAACTTAGATGGAGGAGGTTGATTATAGTAAACGTGAGGGAAAAGGTT 1399  
MGAS28016 sof 1301 TTAGGGAAAAGGTTTGACAGAGTACCTTGGTTTGACAGAATATAGTTCAGATAACTTAGATGGAGGAGGTTGATTATAGTAAACGTGAGGGAAAAGGTT 1400  
MGAS12247 sof 1299 TTAGGGAAAAGGTTTGACAGAGTACCTTGGTTTGACAGAATATAGTTCAGATAACTTAGATGGAGGAGGTTGATTATAGTAAACGTGAGGGAAAAGGTT 1398  
\*\*\*\*\*  
MGAS29482 sof 1400 ACTACTACCACAGTTTTTTCAGATAGGAAATATGAAAATACAATGCCCTTGAAGAAGCTATCAGGACGGCCTTAGCATCTAATTTTCCAAACTCACAGA 1499  
MGAS28016 sof 1401 ACTACTACCACAGTTTTTTCAGATAGGAAATATGAAAATACAATGCCCTTGAAGAAGCTATCAGGACGGCCTTAGCATCTAATTTTCCAAACTCACAGA 1500  
MGAS12247 sof 1399 ACTACTACCACAGTTTTTTCAGATAGGAAATATGAAAATACAATGCCCTTGAAGAAGCTATCAGGACGGCCTTAGCATCTAATTTTCCAAACTCACAGA 1498  
\*\*\*\*\*  
MGAS29482 sof 1500 TAATTTGGTTTTTTCGATATCTAAATAGTTTTTGTCAATAAAGATACAGTTGAGAAAAGCTAAATAGACGTAATTTAGAAAGTACTTAATAGTATTTTTTAC 1599  
MGAS28016 sof 1501 TAATTTGGTTTTTTCGATATCTAAATAGTTTTTGTCAATAAAGATACAGTTGAGAAAAGCTAAATAGACGTAATTTAGAAAGTACTTAATAGTATTTTTTAC 1600  
MGAS12247 sof 1499 TAATTTGGTTTTTTCGATATCTAAATAGTTTTTGTCAATAAAGATACAGTTGAGAAAAGCTAAATAGACGTAATTTAGAAAGTACTTAATAGTATTTTTTAC 1598  
\*\*\*\*\*  
MGAS29482 sof 1600 AAACGTGAATATCGCTATTACAAACATAAAGTGTGACGAAATAGCCGAAAGTAAATGGCTCAACAAGAGGGCATTACCCTTCTATCCGTTGATGTTACTG 1699  
MGAS28016 sof 1601 AAACGTGAATATCGCTATTACAAACATAAAGTGTGACGAAATAGCCGAAAGTAAATGGCTCAACAAGAGGGCATTACCCTTCTATCCGTTGATGTTACTG 1700  
MGAS12247 sof 1599 AAACGTGAATATCGCTATTACAAACATAAAGTGTGACGAAATAGCCGAAAGTAAATGGCTCAACAAGAGGGCATTACCCTTCTATCCGTTGATGTTACTG 1698  
\*\*\*\*\*  
MGAS29482 sof 1700 ATTTAAACTCAGCTTCTAAAGAGTGGGCGACAAGCAGCAGTGCCTAAGGCACTAAGGAAGAGAAAAACAAAAAATGAAGAAGAGCGTAAATACAAA 1799  
MGAS28016 sof 1701 ATTTAAACTCAGCTTCTAAAGAGTGGGCGACAAGCAGCAGTGCCTAAGGCACTAAGGAAGAGAAAAACAAAAAATGAAGAAGAGCGTAAATACAAA 1800  
MGAS12247 sof 1699 ATTTAAACTCAGCTTCTAAAGAGTGGGCGACAAGCAGCAGTGCCTAAGGCACTAAGGAAGAGAAAAACAAAAAATGAAGAAGAGCGTAAATACAAA 1798  
\*\*\*\*\*  
MGAS29482 sof 1800 GTTTGACACCTATCTGAAAAGATGCTGAAGGTAATAATTTCTAAGTAATGTTGAAGAGAGAGATAAGTTCAAAGTACTTTAACAGAGCTGACAAAT 1899  
MGAS28016 sof 1801 GTTTGACACCTATCTGAAAAGATGCTGAAGGTAATAATTTCTAAGTAATGTTGAAGAGAGAGATAAGTTCAAAGTACTTTAACAGAGCTGACAAAT 1900  
MGAS12247 sof 1799 GTTTGACACCTATCTGAAAAGATGCTGAAGGTAATAATTTCTAAGTAATGTTGAAGAGAGAGATAAGTTCAAAGTACTTTAACAGAGCTGACAAAT 1898  
\*\*\*\*\*  
MGAS29482 sof 1900 AAAGACGAAATTTACGGATAAAGTTACGGTGCAGAAAGGATTCCTGGAGTAATCTAATACTGATGGACTTAAAAATTCAAATAACAATAATGTTAAACATC 1999  
MGAS28016 sof 1901 AAAGACGAAATTTACGGATAAAGTTACGGTGCAGAAAGGATTCCTGGAGTAATCTAATACTGATGGACTTAAAAATTCAAATAACAATAATGTTAAACATC 2000  
MGAS12247 sof 1899 AAAGACGAAATTTACGGATAAAGTTACGGTGCAGAAAGGATTCCTGGAGTAATCTAATACTGATGGACTTAAAAATTCAAATAACAATAATGTTAAACATC 1998  
\*\*\*\*\*  
MGAS29482 sof 2000 AACAGGCAAAACACATCGACATGGAGTTTCTTACGTCATCCAAAGAAAGCCTCACCTGGATTATTTCCAAAGAGCAGCTCAAGAAGCCTTTGAGAAAAA 2099  
MGAS28016 sof 2001 AACAGGCAAAACACATCGACATGGAGTTTCTTACGTCATCCAAAGAAAGCCTCACCTGGATTATTTCCAAAGAGCAGCTCAAGAAGCCTTTGAGAAAAA 2100  
MGAS12247 sof 1999 AACAGGCAAAACACATCGACATGGAGTTTCTTACGTCATCCAAAGAAAGCCTCACCTGGATTATTTCCAAAGAGCAGCTCAAGAAGCCTTTGAGAAAAA 2098  
\*\*\*\*\*

MGAS29482 sof 2100 TGGTTCCTCAGCTTTAAATACAAATACGGGTCAATAAAGACAAACTATTAGATAAAGATAAGAAGAGAACAAAACGTGATACACCTACGGAAAAAATAG 2199  
MGAS28016 sof 2101 TGGTTCCTCAGCTTTAAATACAAATACGGGTCAATAAAGACAAACTATTAGATAAAGATAAGAAGAGAACAAAACGTGATACACCTACGGAAAAAATAG 2200  
MGAS12247 sof 2099 TGGTTCCTCAGCTTTAAATACAAATACGGGTCAATAAAGACAAACTATTAGATAAAGATAAGAAGAGAACAAAACGTGATACACCTACGGAAAAAATAG 2198  
\*\*\*\*\*  
MGAS29482 sof 2200 ACTTCTGTAACGGCAGATATCATTCAAATACGTTGACTACAAAAATTAATAATCAAGAAGTTAAGGGTAACAACTTGTGCTGTCAAGTTGACTTATA 2299  
MGAS28016 sof 2201 ACTTCTGTAACGGCAGATATCATTCAAATACGTTGACTACAAAAATTAATAATCAAGAAGTTAAGGGTAACAACTTGTGCTGTCAAGTTGACTTATA 2300  
MGAS12247 sof 2199 ACTTCTGTAACGGCAGATATCATTCAAATACGTTGACTACAAAAATTAATAATCAAGAAGTTAAGGGTAACAACTTGTGCTGTCAAGTTGACTTATA 2298  
\*\*\*\*\*  
MGAS29482 sof 2300 CTAAGAGACCGTTCCTGTTCCAGATGTGGAAGGAGAAGTTGTACCAATACCAGAAAAACCCTGGTGAACCAATGACGCCCTATACCTGCAATTCC 2399  
MGAS28016 sof 2301 CTAAGAGACCGTTCCTGTTCCAGATGTGGAAGGAGAAGTTGTACCAATACCAGAAAAACCCTGGTGAACCAATGACGCCCTATACCTGCAATTCC 2400  
MGAS12247 sof 2299 CTAAGAGACCGTTCCTGTTCCAGATGTGGAAGGAGAAGTTGTACCAATACCAGAAAAACCCTGGTGAACCAATGACGCCCTATACCTGCAATTCC 2398  
\*\*\*\*\*  
MGAS29482 sof 2400 TAATTACCTACCCCTCAACTTCCAAAAGATGAAGATCTGGAGATTAGTGGAGGTCATGGACCGATTGTCGATATCGTCGAAGATACTGGTACAGGTGTT 2499  
MGAS28016 sof 2401 TAATTACCTACCCCTCAACTTCCAAAAGATGAAGATCTGGAGATTAGTGGAGGTCATGGACCGATTGTCGATATCGTCGAAGATACTGGTACAGGTGTT 2500  
MGAS12247 sof 2399 TAATTACCTACCCCTCAACTTCCAAAAGATGAAGATCTGGAGATTAGTGGAGGTCATGGACCGATTGTCGATATCGTCGAAGATACTGGTACAGGTGTT 2498  
\*\*\*\*\*  
MGAS29482 sof 2500 GAGGGCGGCGCTCAAAATGGTGTGGTTCAACTCAGGAAAAAAGATCCAATCGTTGACATCACCAGGATACCCAACCAAGTATGTCAGGCTCAAATG 2599  
MGAS28016 sof 2501 GAGGGCGGCGCTCAAAATGGTGTGGTTCAACTCAGGAAAAAAGATCCAATCGTTGACATCACCAGGATACCCAACCAAGTATGTCAGGCTCAAATG 2600  
MGAS12247 sof 2499 GAGGGCGGCGCTCAAAATGGTGTGGTTCAACTCAGGAAAAAAGATCCAATCGTTGACATCACCAGGATACCCAACCAAGTATGTCAGGCTCAAATG 2598  
\*\*\*\*\*  
MGAS29482 sof 2600 ACGCGACAGTTGTGAGGAAGACACAGCACCTAAACGTCAGATGTCCTTGTGGTGGTCAAAGTATCCAATCGATATCACCAGGATACCCAACCAAG 2699  
MGAS28016 sof 2601 ACGCGACAGTTGTGAGGAAGACACAGCACCTAAACGTCAGATGTCCTTGTGGTGGTCAAAGTATCCAATCGATATCACCAGGATACCCAACCAAG 2700  
MGAS12247 sof 2599 ACGCGACAGTTGTGAGGAAGACACAGCACCTAAACGTCAGATGTCCTTGTGGTGGTCAAAGTATCCAATCGATATCACCAGGATACCCAACCAAG 2698  
\*\*\*\*\*  
MGAS29482 sof 2700 TGTGTCAGGCTCAAATGACGCGACAGTTGTGAGGAAGACACAGTACCTAAACGTCAGATATCCTTGTGGCAGTCAAAGTATCCAATCGATATCACC 2799  
MGAS28016 sof 2701 TGTGTCAGGCTCAAATGACGCGACAGTTGTGAGGAAGACACAGTACCTAAACGTCAGATATCCTTGTGGCAGTCAAAGTATCCAATCGATATCACC 2800  
MGAS12247 sof 2699 TGTGTCAGGCTCAAATGACGCGACAGTTGTGAGGAAGACACAGTACCTAAACGTCAGATATCCTTGTGGCAGTCAAAGTATCCAATCGATATCACC 2798  
\*\*\*\*\*  
MGAS29482 sof 2800 GAAGATACCCAACCAAGCATGTGAGTTCTAATGACGCTACTGTTATCGAAGAAGATACGAAACCAAAACGCTTCTCCACTTTGATAACGAGCCACAAG 2899  
MGAS28016 sof 2801 GAAGATACCCAACCAAGCATGTGAGTTCTAATGACGCTACTGTTATCGAAGAAGATACGAAACCAAAACGCTTCTCCACTTTGATAACGAGCCACAAG 2900  
MGAS12247 sof 2799 GAAGATACCCAACCAAGCATGTGAGTTCTAATGACGCTACTGTTATCGAAGAAGATACGAAACCAAAACGCTTCTCCACTTTGATAACGAGCCACAAG 2898  
\*\*\*\*\*  
MGAS29482 sof 2900 CACCAGAAAAACCTAAAGAGCAACCATCTCTCAGCTTACCACAAGCTCCAGTCTATAAGGCAGCTCATCACTTGCCCTGCATCTGGAGACAAACGTGAAGC 2999  
MGAS28016 sof 2901 CACCAGAAAAACCTAAAGAGCAACCATCTCTCAGCTTACCACAAGCTCCAGTCTATAAGGCAGCTCATCACTTGCCCTGCATCTGGAGACAAACGTGAAGC 3000  
MGAS12247 sof 2899 CACCAGAAAAACCTAAAGAGCAACCATCTCTCAGCTTACCACAAGCTCCAGTCTATAAGGCAGCTCATCACTTGCCCTGCATCTGGAGACAAACGTGAAGC 2998  
\*\*\*\*\*  
MGAS29482 sof 3000 ATCCTTTACAATTTGTTGCTCTAACAAATATTGGAGCTGCAGGTTTGTCTCAGCAAAAAACGTGCGACACCGAAGAAAACTAA 3081  
MGAS28016 sof 3001 ATCCTTTACAATTTGTTGCTCTAACAAATATTGGAGCTGCAGGTTTGTCTCAGCAAAAAACGTGCGACACCGAAGAAAACTAA 3082  
MGAS12247 sof 2999 ATCCTTTACAATTTGTTGCTCTAACAAATATTGGAGCTGCAGGTTTGTCTCAGCAAAAAACGTGCGACACCGAAGAAAACTAA 3080  
\*\*\*\*\*
