# Supplementary material for: Opacification Domain of Serum Opacity Factor Inhibits Beta-Hemolysis and Contributes to Virulence of Streptococcus pyogenes
Source: PubMed Central journal article supplement (PMC5397570; doi:10.1128/mspheredirect.00147-17), 2017-04-19
Supplement: sph002172272sf6.pdf [file sph002172272sf6.pdf]

|           |     |      |                                                                                                                                                                                  |      |
|-----------|-----|------|----------------------------------------------------------------------------------------------------------------------------------------------------------------------------------|------|
| MGAS29482 | SOF | 1    | MTNCKYKLRKLSVGLVSVGTM LIAPTVLGQEVSA S S S T E S S T T T A N T G T G T A S G M T A T T P S A T T D T G E A A G S G A R S E A N G A S S V V S S E E S Q S S G T T P A S P          | 100  |
| MGAS28016 | SOF | 1    | MTNCKYKLRKLSVGLVSVGTM LIAPTVLGQEVSA S S S T E S S T T T A N T G T G T A S G M T A T T P S A T T D T G E A A G S G A R S E A N G A S S V V S S R R K S E F R H Y S S L T          | 100  |
| MGAS12247 | SOF | 1    | MTNCKYKLRKLSVGLVSVGTM LIAPTVLGQEVSA S S S T E S S T T T A N T G T G T A S G M T A T T P S A T T D T G E A A G S G A R S E A N G A S S V V S S E E S Q S S G T T P A S P<br>***** | 100  |
| MGAS29482 | SOF | 101  | QAQTAPAATSTSSASSNEKTPKTATTTTSSTPVASTSNNSNKVTSTEAETQTHDVERYTVDKENSKLNIKDGKTPKTRSSVNKDTKLI RNRDDKQRDIV                                                                             | 200  |
| MGAS28016 | SOF | 101  | PSTDSSSNVNIIGFF-----                                                                                                                                                             | 116  |
| MGAS12247 | SOF | 101  | QAQTAPAATSTSSASSNEKTPKTATTTTSSTPVASTSNNSNKVTSTEAETQTHDVERYTVDKENSKLNIKDGKTPKTRSSVNKDTKLI RNRDDKQRDIV                                                                             | 200  |
| MGAS29482 | SOF | 201  | DVTRTVKTNEDGTIDVTVTVKPKQIDEGADVMALLDVSQKMTKENFDKAKEQIKKMVTTLTGEPDGGKENHNRNRVRLMTFYRKVNEPIELTAENVDKT                                                                              | 300  |
| MGAS28016 | SOF | 117  | -----                                                                                                                                                                            | 116  |
| MGAS12247 | SOF | 201  | DVTRTVKTNEDGTIDVTVTVKPKQIDEGADVMALLDVSQKMTKENFDKAKEQIKKMVTTLTGEPDGGKENHNRNRVRLMTFYRKVNEPIELTAENVDKT                                                                              | 300  |
| MGAS29482 | SOF | 301  | LDEVWKKAKEDWDWGDVLDQGAIHKAREIFNKEKEKKSQRQHIVLFSQGESTFSYDIKNKSDITKTKITEKVTTSSPLFPWLPFNHNTNRKAEIIGDLEK                                                                             | 400  |
| MGAS28016 | SOF | 117  | -----                                                                                                                                                                            | 116  |
| MGAS12247 | SOF | 301  | LDEVWKKAKEDWDWGDVLDQGAIHKAREIFNKEKEKKNRVNASISSCSKANQPLVMILKIKVILQKQK-----                                                                                                        | 367  |
| MGAS29482 | SOF | 401  | VLDMAEKVIGISLPSLSKSAVKALGLTNSAIGSILGKGLTEYLGLEYSSDNLDDGGGFDYSKRVGEGYYYHSFSDRKYENTMPLLEAIRTALASNFPKLT                                                                             | 500  |
| MGAS28016 | SOF | 117  | -----                                                                                                                                                                            | 116  |
| MGAS12247 | SOF | 368  | -----                                                                                                                                                                            | 367  |
| MGAS29482 | SOF | 501  | NWFFDIILNSFVNKDTVEKAKLDVIMKVLNSIFYKREYRYNHLSAIAEAKMAQEGITFYSDVDTLNSASKRVRRAAVRKGTKEEENKNEERNTK                                                                                   | 600  |
| MGAS28016 | SOF | 117  | -----                                                                                                                                                                            | 116  |
| MGAS12247 | SOF | 368  | -----                                                                                                                                                                            | 367  |
| MGAS29482 | SOF | 601  | FDTYLKKMSEGNFVLSNVEERDKFKDTLTELTIKDEFDVKVTEKDSWSKSIITDGLKNSNNNVKHQQANTSTWFFSFSKESLTWIIISKEQLKEAFEKN                                                                              | 700  |
| MGAS28016 | SOF | 117  | -----                                                                                                                                                                            | 116  |
| MGAS12247 | SOF | 368  | -----                                                                                                                                                                            | 367  |
| MGAS29482 | SOF | 701  | GSLTFKYKLRVNDKLLDKDKRTRKRDTP TENKTSVTADII SNTVDYKINNQEYKGNKLDVAVKLT YTKETVPVPDVEGEVVP IPEKPLVEPMTPLYPAIP                                                                         | 800  |
| MGAS28016 | SOF | 117  | -----                                                                                                                                                                            | 116  |
| MGAS12247 | SOF | 368  | -----                                                                                                                                                                            | 367  |
| MGAS29482 | SOF | 801  | NYPTPLPKDEDL EISGGHPIDVIVEDGTGVEGGAQGVVSTQENKDPIDVITEDTQPGMSGSDATVVEEDTAPKRPDVLVGGQSDPIDITEDTQPS                                                                                 | 900  |
| MGAS28016 | SOF | 117  | -----                                                                                                                                                                            | 116  |
| MGAS12247 | SOF | 368  | -----                                                                                                                                                                            | 367  |
| MGAS29482 | SOF | 901  | VSGSDATVVEEDTVPKRPDILVGGQSDPIDITEDTQPGMSGSDATVIEEDTKPKRFFHFDNEPQAPEKPKQPSLSLPQAPVYKAAHHL PASGDKREA                                                                               | 1000 |
| MGAS28016 | SOF | 117  | -----                                                                                                                                                                            | 116  |
| MGAS12247 | SOF | 368  | -----                                                                                                                                                                            | 367  |
| MGAS29482 | SOF | 1001 | SFTIVALTIIGAAGLLSKRRDTEEN                                                                                                                                                        | 1026 |
| MGAS28016 | SOF | 117  | -----                                                                                                                                                                            | 116  |
| MGAS12247 | SOF | 368  | -----                                                                                                                                                                            | 367  |
