# Supplementary material for: Opacification Domain of Serum Opacity Factor Inhibits Beta-Hemolysis and Contributes to Virulence of Streptococcus pyogenes
Source: PubMed Central journal article supplement (PMC5397570; doi:10.1128/mspheredirect.00147-17), 2017-04-19
Supplement: sph002172272sf7.pdf [file sph002172272sf7.pdf]

**A**

TTGACAAATTTGTAAGTATAAACTTAGAAAAGTTATCTGTAGGGCTCGTCTCCGTCGGAACGATGCTGATAGCTCCGACAGTTTTAGGACA  
GGAGGTTAGTACTGGTGTAGCAGTACTGAGACGAGTCTAGTACTAATACTAGTACCGCTAGCGCTGGTACAGTACGAGTGAACAG  
CTGCCAGCGAACTGGGAGTGAAGCAGCTGTAGTATCTAGCGAAGGAAGTCAGAGTTCAGAACTCTGGACAAGCCTCAACACAACCTCAA  
GCACAGACTTTAGAACAAATCAGCAGCAACCGTCGCCATCATCGAACTCTCTACTAGTAGTAGTGAAGATAAAAGCTCCTAAGGCAGCAAG  
CACTAAATCATCTTCAGCAACTGTGGCTAGCTCTAGTAATGGTAGCAATCAAGGTGCTGGTGTGAAGATGCACCACAGATGATGGACG  
TGAACCGTATACAGTTGATAGGGAAAAACAGAGCTAAATATTAAGACCGTAAGACTCCAAAAACTAGGAATAGTGTGATAAAGAT  
ACAAAGCTTATTAGAAACCGCGATGGCAAAACAGCGTGATATTGTTGATATCAAGCGTGAAGTAAAAGATAATGGCGACGGAACCTTAGA  
TGTAACCTTAAAAGTAACACCTAAAAGAAATTGATAAAGGTGCCGATGTTATGGCCCTTTAGATGTCCTAAAAAAGATGACGGATGCTG  
ATTTTAAAAACGCTAAGGATAAGATCAAGAAATTAGTCAACAACCTTAAACGAGTAAATCAGCGAGTAACTCAGATAATGATGAGCATAAA  
CATAATCTCGAAATTCGGTTCGCTGTGATGACCTTTTACCGTGTAGTATAGCAACCCAAATGATATATCGGGAAAAACTGATGCTGAAC  
TGATAAATTTAGACGATCTTCGAGTAAAAGCTAAAAGCTAAATATGACTCGGGGGTTGATTTACAAGGCGTATCCACAAAGCTCGGG  
AAATTTTAAATAAGAAAAAGAGTCAAAAAACGCCAGCATATCGTCTTGTCTCTCAAGGCGAGTGCAGCTTTAGTTATGATATTCAA  
AAGAGTGAGAAAGAGAAAAGTAGCAATTTATCTCGTATAAACGAAAAAATTACCTCCCTAATCCCGCTGTTGCCCTGCCACCAATTTT  
TGATCATACGCATCAAAATGGAGATATGATTAATGATGTTAGAGCTTAAATTCGATTTGCTAGTAAGCTAGGTATAAAGAATTTATCAT  
GGATTGAAACATCACTTAGTGCCTAAGCGTAGGAAGTAACTTGCTTGGTTCGTTTTTGGTGGAGGTGGACTAGGCGAGTACCTAACT  
TTAAAAGAATATGATTCACAAAAATTAATGAAGACCAATTTGATTACTAAACGCGTAGGCGAAGGATATCATTATCATAGTTTTTC  
AAATAGGGAATCTGAGGATAAAATGCCCTTTGAAACGAAATTA AAAAGCTTTAGAAAGCTGCTTTACCAAAATTCGAAGAAAAA  
GGTTTACCAAGTACTAAAATACTTTGGATTGAAAGATAAAGCTGAACAAGCCAAACTTGATGTAATCATGAAAAGTATAAAAGTGT  
TTCTACAAGCGCCAGTACCCTATTATAATCAAACTCTCAGCGATAGCCGAGGCTAAGATGGCGCAGAAAGAGGGCATTACCTTCTA  
TTCCGTTGATGTTACTGCTTTAAACACCGCTAGAAGAGTGAAGCGACAAACAGCAGTGTAAAGAACACTAAGGAAGAAGACGTAATA  
AGAAGTTGATGAGTATCTGAAAAAGATGTCTGAAGCGGTAACGCATTTTTAACGATGTGGATAAGGCAGATAAGTTCAAAGACACT  
TTAACAAAACCTTACGATTAAGACGAGTTTGACGGCAAGGTTAGTGTGATAAACTTCATATCAATCCAGTAGTGCATCAACTATTC  
TGAAGCTAGTAATAGTTTTTGGCGTACTACCAAGAAAGTCTCACTTTGGACCATTTCCAAAGAGCAGTTGAAAAAGCCTTTGAAAGATG  
GAAAACCGTTAACCTTACCTATAAGCTTAAAGTTGATAACAACAAGTTAAAACAGCTCTCGAGGAAAATAATAAGAAGAAGAGAACA  
AAACGTTTACACCTACAGAAAATGAAAACCTCTGTACAGAAAAAATCAATTTCAAATACTACTACCTACGAAATTAATGAACAAAAAGT  
TGAAGGGAACAACCTGGTGTGTTAGTCTGCATACAGTAAATCAAGGTTCTGTACCACAGATTGATGGGCATGTTATTGAGCCAC  
AAGCACCGACATACCTAAGTTACCTCTGTTATTGAGCATGGCCCTAACTTTGAGTATGAGGAAGAAACAGGTTATCAGTTACCACT  
AAACATGGCAGCAATGCACCAGACACACAAGTGACAAATGAAGAAGACAGTTCCTCAACGTCAGATATCCTTGTAGGCGGTGAGAG  
TGGACCGTTGACATACCCGAAGATAACCAACAGGATGTGACAGGCTCAAATGACGCGACAGTTGTGCGAGGAAGACACAGCCTAAAC  
GTCCAGATGTCTTGTGGTGGTCAAAGTGAGCCAATCGATATCACTGAAGATACCCAACCAAGTGTGTCAGGCTCAATGACGCGACA  
GTTGTGCGAGGAAGACACAGTACCTCAACGTCAGATATCCTTGTGGCGGTCAAAGTATGATCCAAATCGATATACCCGAAGATAACCAAC  
AGGTATGTGAGGCTCAAATGACGCTACTGTTATCGAAGAAGATACGAACCAAAACGCTTCTTCCACTTTGATAACGAGCCACAAGCAC  
CAGAAAAACCTAAAGAGCAACCATCTCTCAGCTTACCACAAGCTCCAGTCTATAAGGCAGCTCATCACTTGCCTGCATCTGGAGACAAA  
CGTGAAGCATCTTTACAATTTGCTCTAACAAATTTGAGGCTGCAGGTTTGTCTCAGCAAAAACGTCGCGACACCGAAGAAAACTA

A

**B**

|            |            |             |            |            |            |            |
|------------|------------|-------------|------------|------------|------------|------------|
| MTNCKYKLRK | LSVGLVSVGT | MLIAPTVLGQ  | EVSTGASSTE | TSASTNTSTA | SAGTSTSETA | ASGTGSEAAV |
| VSSEGSQSSE | SGQASTQPQA | QTLEQSAATS  | PSSNSSTSSS | EDKAPKAAST | KSSSATVASS | SNGSNQGAGA |
| EDAPQMMDVE | RYTVDREKTE | LNKIDGKTPK  | TRNSVDKDTK | LIRNRDQKQR | DIVDIKREVK | DNGDGLDVT  |
| LKVTPKEIDK | GADVMALLDV | SKKMTDADFK  | NAKDIIKKLV | TTLTSKSASN | SDNDEHKHNS | RNSVRLMTFY |
| REISNPIDIS | GKTDDELDKL | LDDLRVKAKA  | NYDWGVDLQG | AIHKAREIFN | KEKESKKRQH | IVLFSQGEST |
| FSYDIQKSEK | EKSSNLSRIN | EKITSSNPLL  | PWPPIFDHTH | QNGDMINDVR | ALIAFASKLG | IKNLSWIETS |
| LSALSVGSNL | LGSVFGGGGL | GEYLTLEKEYD | SQKLNEDQFD | YTKRVGEGYH | YHSFSNRESE | DKMPLETEIK |
| KALEAALPKF | EENNWFTKVL | KYFGLKDCAE  | OAKLDVIMKV | IKSVFYKRQY | HYNHNLSAI  | AEAKMAQKEG |
| ITFYSDVDTA | LNTARRVKRQ | TAVLKNTKEE  | ERNKFFDEYL | KKMSEGNF   | FNDVDKADKF | KDTLTKLTIK |
| DEFDGVSVSD | KTSYQSSSAI | NYSEASNSFW  | RTTKESLWT  | ISKEQLKCAF | EDGKPLTFTY | KLKVDNNKFK |
| TALEENNNKK | RTKRSTPTEN | ENSVTEKIIS  | NTTYEINEQ  | KVEGNKLDV  | SLTYSKFKVP | VPQIDGHVIE |
| PQAPTLPKLP | PVIEHGNPFE | YEETGYQLP   | LKHGSNAPDT | QVTIEEDTVP | QRPDILVGGQ | SGPVDITEDT |
| QPGMSGNSDA | TVVEEDTAPK | RPDVLVGGQS  | EPIDITEDTQ | PSVSGSNDAT | VVEEDTVPQR | PDILVGGQSD |
| PIDITEDTQP | GMSGNSDATV | IEEDTKPKRF  | FHFDPNPQAP | EKPKEQPSLS | LPQAPVYKAA | HHLPASGDKR |
| EASFTIVALT | IIGAAGLLSK | KRRDTEEN    |            |            |            |            |
