# Supplementary material for: Opacification Domain of Serum Opacity Factor Inhibits Beta-Hemolysis and Contributes to Virulence of Streptococcus pyogenes
Source: PubMed Central journal article supplement (PMC5397570; doi:10.1128/mspheredirect.00147-17), 2017-04-19
Supplement: sph002172272sf8.pdf [file sph002172272sf8.pdf]

**A**

TTGACAAATTTGTAAGTATAAACTTAGAAAAGTTATCTGTAGGGCTCGTCTCCGTCGGAACGATGCTGATAGCTCCGACAGTTTTAGGACA  
GGAGGTTAGTACTGGTCTAGCAGTACTGAGACGAGTGTACTAATACTAGTACCCTAGCGTGGTACCAGTACGAGTACGAGCAG  
CTGCCAGCGAACTGGGAGTGAAGCAGCTGTAGTATCTAGCGAAGGAAGTCAGAGTTCAGAACTGGACAAGCCTCAACACAACTCAA  
GCACAGACTTTAGAACAACTCAGCAGCAACGTCGCCATCATCGAACTCTTCTACTAGTAGTAGTGAAGATAAAGCTCCTAAGGCAGCAAG  
CACTAAATCATCTTCAGCAACTGTGGCTAGCTCTAGTAAATGGTAGCAATCAAGGTGCTGGTGTCTGAAGATGCACCACAGATGATGGACG  
TGGAACGGTATACAGTTGATAGGGAACACAGAGCTAAATATAAAGACGGTAAGACTCCAAAACTAGGAATAGTGTGATAAAGAT  
ACAAAGCTTATTTAGAAACCGGATGGCAACACGCGTGATATTGTGATATCAAGCGTGAAGTAAAAGATAATGGCGACGGAACCTTAGA  
TGTAACCTTAAAAGTAACACTAAAGAAATTTGATAAAGGTGCGGATCTTATCGCCCTTTTAGATCTCTTAAAAAGATGACCGATGCGTG  
ATTTTAAAAACCGTAAAGGATAAGATCAAGAAATTTACTCACAACCTTAACCACTAAATCACCCTAACTCAGATAATGATGAGCATAAAA  
CATAAATTCGCAAAATTCGGTTCGTCTCATGACCTTTTACCGTTCAGATAGCAACCCAAATTCATATATCGGGAAAAACATGATCGTGAAC  
TCATAAAATTTATGACCATCTTCCACTAAAAAGCTAAAGCTAAATTTACTCAGCTCGGGCTTCATTTACAAGCCCTATCCACAAAAGCTCGGG  
AAATTTTAAATAAGCAAAAACACTCAAAAAACGCCACGATATCGCTCTTCTCTCAAGCCGACTCGACTTTTACTTATGATATTCAA  
AAGACTCGAAGACGAAAACTAGCAATTTATCTCCTATAAAGCAAAAAATTTACTCCTCTAAATCCCTCTTGGCCCTGGCCACCAATTTT  
TCATCATACCGCATCAAAATTCGAGATATGATTAATGATCTTAGACTTAAATTCGATTTGATTTGATTTGCTAGTAAGCTAGCTATAAAGAAATTTATCAT  
CGATTCAAAACATCACTTACTCGCTTAAAGCCTAGCAACTAACTTCCTTCTCTCTTTTTCCTGCGAGCTGACTTACGGCAGTACCTAACT  
TTAAAAGCAATATGATTCACAAAAATTAATTAAGACCAATTTGATTAATAAACCCTACCGCAACGATATGATTAATCATAGCTTTTTC  
AAATACGGAATCTGACGATAAAATGCCCTCTTCAAAACAGAAATTAAAAAACCTTTAGAAGCTGCTTTACCAAAATTCGAACAAAAATACT  
CGTTTACCAAACTACTAAAAATCTTTCGATTCAAAACATAAAGCTCAAGCAACCAAACTTCATGTAATGATCAAACTCATAAAACTCTC  
TTCTACAAGCCCTACTACCACTATTAATTAATCACAATCTCTCAGCCATAGCCGAGCTAAGATGCCCCAGAAACAGCCCATTTACCTCTA  
TTCCCTTCATCTTACTGCTTTTAAACACCCCTACAAGACTCAAGCCACAACACCCAGTCTTAAAGAACACTAAGCAAGAACAACTTAATA  
AGAAGTTTGTGATGACTATCTCAAAAAGATCTCTGAAGGCGTAAACCAATTTTTTAAAGATCTGATAAAGCCAGATAAGTTCAAAAGACACT  
TTAAACAAACTTACGATTAAGACCCGATTTGACCCGAAAGTTACTGTCGATAAAACTTCATATCAATCCAGTACTGCAATCAACTATATTC  
TGAAGCTAGTAAATAGTTTTTGGCTACTACCAAAAGAACTCTCACTTGGACCAATTTCCAAAGACGACTTCAAAAAAGCCTTTGAAGATG  
CAAAACCGTTAACTTCACTATAAGCTTAAAGTTGATAAACAACAAGTTTAAAAACAGCTCTCGACGAAAAATAAAGAAACAAAGACACA  
AAAGCTTCTACACTACAGAAAAATCAAAACTCTGTACACAAAAAAATCATTTCAAAATACTACTACTACCAAAATTAATGAACAAAAAGT  
TGAACCGAACAACTTGGTCAATGTTAGTCTGACATACACTAAATTCAGCTTCTCTTACCACAGATTGATGGCATGTTATTGACCCAC  
AAGCACCGACATTTACCTAAGTTAGCTCTCTTATTGACGATGGCCCTAACTTTGAGTATGAGGAAGAAACAGGTTATCAGTTACCCTT  
AAACATGGCAGCAATGCACCAGACACACAAGTGAACAATTTGAAGAAGACACAGTTCCTCAACGTCCAGATATCCTTGTAGGCGGTGAGAG  
TGGACCGTTGACATCACCGAAGATACCAACCAAGGTATGTCAGGCTCAAATGACCGACAGTTGTGAGGAAGACACAGCACTAAAC  
GTCCAGATGTCTTGTGGTGGTCAAAGTGAAGCAATCGATATCACTGAAGATACCAACCAAGTGTGTGAGGCTCAAATGACGCGACA  
GTTGTGAGGAAGACACAGTACCTCAAGCTCCAGATATCCTTGTGGCGGTCAAAGTATCCAAATCGATATCACCGAAGATACCAAC  
AGGTATGTCAGGCTCAAATGACGCTACTGTTATCGAAGAAGATACGAACCAAAACGCTTCTTCCACTTTGATAACGAGCCACAAGCAC  
CAGAAAAACCTAAAGAGCAACCATCTCTCAGCTTACCACAAGCTCCAGTCTATAAAGGACGCTCATCACTTGCCTGCATCTGGAGACAAA  
CGTGAAGCATCCTTTACAATTTGTGCTTAACAATTTATGGAGCTGCAGGTTTGTCTCAGCAAAAACGTCGGCAGACCGAAGAAAACTA

**B**

MTNCKYKLRK LSVGLVSVGT MLIAPTIVLQ EVSTGASSTE TSASTNTSTA SAGTSTSETA ASGTGSEAAV  
VSSEGSQSSE SGQASTQPQA QTLQSAATS PSSNSSTSSS EDKAPKAAST KSSSATVASS SNGSNQGAGA  
EDAPQMDVE RYTVDRKTE LNIKDGKTPK TRNSVDKDTK LIRNRDQKOR DIVDIKREVK DNGDGLDVT  
LKVTPKEIDK GADPNFEYEE ETGYQLPLKH GSNAPDTQVT IEEDTVPQRP DILVGGQSGP VDITEDTQPG  
MSGSDATVV EEDTAPKRPD VLVGQSEPI DITEDTQPSV SGSNDATVVE EDTVPQRPDI LVGGQSDPID  
ITEDTQPGMS GSNDATVIEE DTKPKRFFHF DNEFQAPEKP KEQPSLSLPQ APVYKAAHHL PASGDKREAS  
FTIVALTIIG AAGLLSKRRR DTEEN
