# Supplementary material for: Opacification Domain of Serum Opacity Factor Inhibits Beta-Hemolysis and Contributes to Virulence of Streptococcus pyogenes
Source: PubMed Central journal article supplement (PMC5397570; doi:10.1128/mspheredirect.00147-17), 2017-04-19
Supplement: sph002172272sf9.pdf [file sph002172272sf9.pdf]

**A**

TTGACAAATTGTAAGTATAAACTTAGAAAAGTTATCTGTAGGGCTCGTCTCCGTCGGAACGATGCTGATAGCTCCGACAGTTTTAGGACA  
GGAGGTTAGTACTGGTGTAGCAGTACTGAGACGAGTGTACTACTAATACTAGTACCCTAGCGTGGTACCAGTACGAGTGAGACAG  
CTGCCAGCGAACTGGGAGTGAAGCAGCTGTAGTATCTAGCGAAGGAAGTCAAGAGTTCAGAACTGGACAAGCTCAACACAACTCAA  
GCACAGACTTTAGAACAATCAGCAGCAACGTCGCCATCATCGAACTTCTACTAGTAGTAGTGAAGATAAAGCTCCTAAGGCAGCAAG  
CCTAAATCATCTTCAGCAACTGTGGCTAGCTCTAGTAAATGGTAGCAATCAAGGTGCTGGTGTGAAGATGCACCACAGATGATGGACG  
TGGAACCGTATACAGTTGATAGGAAAAACAGAGCTAAATATTAAGACGGTAAGACTCCAAAACTAGGAATAGTTCGATAAAGAT  
ACAAAAGCTTATTTAGAAAACCGGATGGCAAAACAGCGTGATATTTGTTGATATCAAGCGTGAAGTAAAAAGATAATGGCGACGGAACCTTAGA  
TGTAACCTTAAAAAGTAACCTTAAAGAAATTTGATAAAGGTGCCGATGTTATGGCCCTTTTAGATGCTCTTAAAAAGATGACGGATGCTG  
ATTTTAAAAACGCTAAGGATAAGATCAAGAAATTAGTACACAACCTTAAACGAGTAAATCAGCGAGTAACTCAGATAATGATGACATAAA  
CATAATTCGCAAAATTCGGTTCGTCTGATGACCTTTTACCGTGAGTATAGCAACCCAAATGATATATCGGGAAAAACGTGATGCTGAACT  
TGATAAATTTATAGACGATCTTCGAGTAAAAGCTAAAGCTAATTATGACTGGGGGGTTGATTTACAAGGCGCTATCCACAAAGCTCGGG  
AAATTTTAAATAAGGAAAAAGAGTCAAAAAACGCCAGCATACTGCTCTGTTCTCTCAGGCGAGTGCAGCTTTTAGTTATGATATTCAA  
AAGAGTGAGAAAGAGAAAAAGTAGCAATTTATCTCGTATAAACGAAAAAATTACCTCCTCTAATCCGCTGTTGCCCTGGCCACCAATTTT  
TGATCATACGCATCAAAATGGAGATATGATTAATGATGTTAGAGCTTTAATTTGCATTTGCTAGTAAGCTAGGTATAAAGAAATTTATCAT  
GGATTGAAACATCACTTAGTGCCTAAGCGTAGGAAGTAACTTGCTTGGTTCGTTTTTGGTGGAGGTGGACTAGGCGAGTACCTAACT  
TTAAAAGAAATGATTCACAAAAATTAATGAAGACCAATTTGATTATACTAAACCGCTAGGCGAAGGATATCATTATCATAGTTTTTC  
AAATAGGGAATCTGAGGATAAAATGCCCTTTGAAACAGAAATTA AAAAGCTTTAGAAAGCTGCTTTACCAAAATTCGAAGAAAAA  
GGTTTACCAAAAGTACTAAAATACCTTTGGATTGAAAGATAAAGCTGAACAAGCCAAACTTGATGTAATCATGAAAGTATTA AAAAGTGC  
TTCTACAAGCGCCAGTACCCTATTATAATCACAACTCTCAGCGATAGCCGAGGCTAAGATGGCGCAGAAAGAGGGCATTACCTTCTA  
TTCCGTTGATGTTACTGCTTTAAACACCGCTAGAAGAGTGAAGCGACAAACAGCAGTCTAAAGAACACTAAGGAAGAAAGAACTAATA  
AGAAGTTTGATGAGTATCTGAAAAAGATGCTGAAGGCGGTAACGCATTTTTAACGATGTGGATAAGGCAGATAAGTTC AAAGACT  
TTAACAAAACCTTACGATTAAGACGAGTTTGACGGCAAGGTTAGTGTGCGATAAAAATTCATACTCAATCCAGTAGTGCAATCAACTATTC  
TGAAGCTAGTAATAGTTTTTGGCGTACTACCAAGAAAGTCTCACTTGGACATTTCCAAAGAGCAGTTGAAAAAGCCTTTGAAGATG  
GAAAAACCGTTAACCTTACCTATAAGCTTAAAGTTGATAACAACAAGTTTAAAAACAGCTCTCGAGGAAAAATAAAGAAAGAGAGAACA  
AAACGTTCTACACTAGCAAAAATGAAAACCTCTGTACAGAAAAAATCATTTCAAATACTACTACCTACGAAATTAATGAACAAAAAGT  
TGAAGGGAACAACTTGGTGTAGTTAGTCTGACATACAGTAAATCAAGGTTCTGTACCACAGATTGATGGGCATGTTATTTAGCCAC  
AAGCACCAGCATTACCTAAGTTACCTCCTGTTATTGAGCATGGCCCTAACTTTGAGTATGAGGAAGAAACAGGTTATCAGTTACCACCT  
AAACATGGCAGCAATGCACCAGACACACAAGTGACAATTGAAAGACACACTTCTTCAACCTCCAGATATCTTCTTACCCCGCTCAGAG  
TCGACCCGTTGAGATCAGCCGAAGATACCCAAACGAGCTATGCTCAGGCTCAAAATGACCCGACACTTGTCTGAGGAAAGACAGCAGCTAAAG  
CTCCAGATCTCTTCTTGGTCTCAAAGTACGCCAATCGATATCACTGAAAGTATCCCAACCAACTCTGTCTCAGGCTCAAAATGACCCGACA  
CTTCTCGAGCAAGACACAGTACCTCAACCTCCAGATATCTTCTTGGCGCTCAAAGTATGATCCAAATCGATATCAGCCGAAGATACCCAAAG  
AGCTATCTCAGGCTCAAAATCAGCCTACTCTTATCCGAAGAAGATACGAAACCAAAAACGCTTCTTCCACTTTGATAACGAGCCACAAGCAC  
CAGAAAAACCTAAGAGCAACCATCTCTCAGCTTACCACAAGCTCCAGTCTATAAAGGAGCTCATCAGTTGCCCTGCATCTGGAGACAAA  
CGTGAAGCATCTTTACAATTTGTTGCTCTAACAAATTTGGAGCTGCAGGTTTGGCTCAGCAAAAACGTCGCGACACCGAAGAAAACTA  
A

**B**

MTNCKYKLRK LSVGLVSVGT MLIAPTIVLQ EVSTGASSTE TSASTNTSTA SAGTSTSETA ASGTGSEAAV  
VSSEGSQSSE SGQASTQPQA QTLQSAATS PSSNSSTSSS EDKAPKAAS KSSSATVASS SNGSNQGAGA  
EDAPQMDVE RYTVDRKTE LNIKDGKTPK TRNSVDKDTK LIRNRDQKQR DIVDIKREVK DNGDGLDVT  
LKVTPKEIDK GADVMALLDV SKKMTDADFK NAKDKIKKLV TLTLSKSASN SDNDEHKHNS RNSVRLMTFY  
REISNPIDIS GKTDALDKL LDDLRVKAKA NYDWGVDLQ AIHKAREIFN KEKESKKRQH IVLFSQGES  
FSYDIQKSEK EKSSNLSRIN EKITSSNPLL PWPPIFDHTH QNGDMINDVR ALIAFASKLG IKNLWSIETS  
LSALSVGSNL LGSVFGGGL GEYLTLKEYD SQKLNEQFD YTKRVGEGYH YHSFSNRESE DKMPLETEIK  
KALEALPKF EENNWF TKVL KYFGLKDKAE QAKLDVIMKV IKSIFYKRY HYYNHNSAI AEAKMAQKEG  
ITFYSVDVTA LNTARRVKRQ TAVLKNTKEE ERNKKFDEYL KKMSEGGNAF FNDVDKADF KDTLTKLTIK  
DEFDGVKSV D KTSYQSSAI NYSEASNSFW RTTKESLWT ISKEQLKAF EDGKPLFTY KLKVDNNKFK  
TALEENNNKK RTRKSTPTEN ENSVTEKIIIS NTTTTYEINEQ KVEGNKLGDV SLTYSKFKVP VPQIDGHVIE  
PQAPTLPKLP PVIEHGNPFE YEEETGYQLP LKHGSNAPDT QVTIETKPKR FFHFDNEPQA PEKPKEQPSL  
SLPQAPVYKA AHHLPASGDK REASFTIVAL TIIGAAGLLS KKRRDTEEN
