# Supplementary material for: Opacification Domain of Serum Opacity Factor Inhibits Beta-Hemolysis and Contributes to Virulence of Streptococcus pyogenes
Source: PubMed Central journal article supplement (PMC5397570; doi:10.1128/mspheredirect.00147-17), 2017-04-19
Supplement: sph002172272st1.pdf [file sph002172272st1.pdf]

**TABLE S1** Primers used for constructing isogenic mutant strains.

| Primers  | Sequences                                                    | Remarks                |
|----------|--------------------------------------------------------------|------------------------|
| sofEZ-1  | 5'- GCGT <u>GGATCC</u> GACTATACCCCCAGTACCAGAGGTG -3'         | Underlined: BamHI site |
| sofEZ-2  | 5'- TTTCTTCCCTCACTCAAAGTTAGGATCGGCACCTTTATCAATTTCTTTA -3'    |                        |
| sofEZ-3  | 5'- TAAAGAAATGATAAAGGTGCCGATCCTAACTTTGAGTATGAGGAAGAAA -3'    |                        |
| sofEZ-4  | 5'- GCGT <u>GGATCC</u> TGATAGTTTCGAGCTGCCTAGCGT -3'          | Underlined: BamHI site |
| sofFB-1  | 5'- GCGT <u>GGATCC</u> GGTTGATTTACAAGGCGCTATCCAC -3'         | Underlined: BamHI site |
| sofFB-2  | 5'- AGTGAAGAAGCGTTTTGGTTTCGTTTCAATTGTCACTTGTGTCTGGT -3'      |                        |
| sofFB-3  | 5'- ACCAGACACACAAGTGACAATTGAAACGAAACAAAACGCTTCTTCCACT -3'    |                        |
| sofFB-4  | 5'- GCGT <u>GGATCC</u> ACCAGGAACAGGACTAGGAGCAGGA -3'         | Underlined: BamHI site |
| Sofdel-1 | 5'- CATTACAGGAGTGGTAACGCTGGCG -3'                            |                        |
| Sofdel-2 | 5'- TATTAATTTGTTTCGTATGTATTCAATGTTTAGTTAACCTTACTTTTCATTA -3' |                        |
| Sofdel-3 | 5'- TAATGAAAGTAAGGTTAACTAAACATTGAATACATACGAACAAATTAATA -3'   |                        |
| Sofdel-4 | 5'- CTTAGGGTCGCTAGACTAACGAGGGCCGAGCTCGAATTGACGCGGATCCA -3'   |                        |
| Sofdel-5 | 5'- TGGATCCGCGTCAATTCGAGCTCGGCCCTCGTTAGTCTAGCGACCCTAAG -3'   |                        |
| Sofdel-6 | 5'- GCTCGCTTTGACCACCTACAAGAAC -3'                            |                        |
| sagB-1   | 5'- GCGT <u>GGATCC</u> CAAACGGTGCTAAAAACGTCAAAGC-3'          | Underlined: BamHI site |
| sagB-2   | 5'- GCGT <u>GGATCC</u> TCTAACGTTTTCCTCAGAGCTATGC-3'          | Underlined: BamHI site |
